# Supplementary material
Source: PubMed Central journal article supplement (PMC4194135)
Supplement: NIHMS618714-supplement-Supp_FigureS1-S2.pdf [file NIHMS618714-supplement-Supp_FigureS1-S2.pdf]

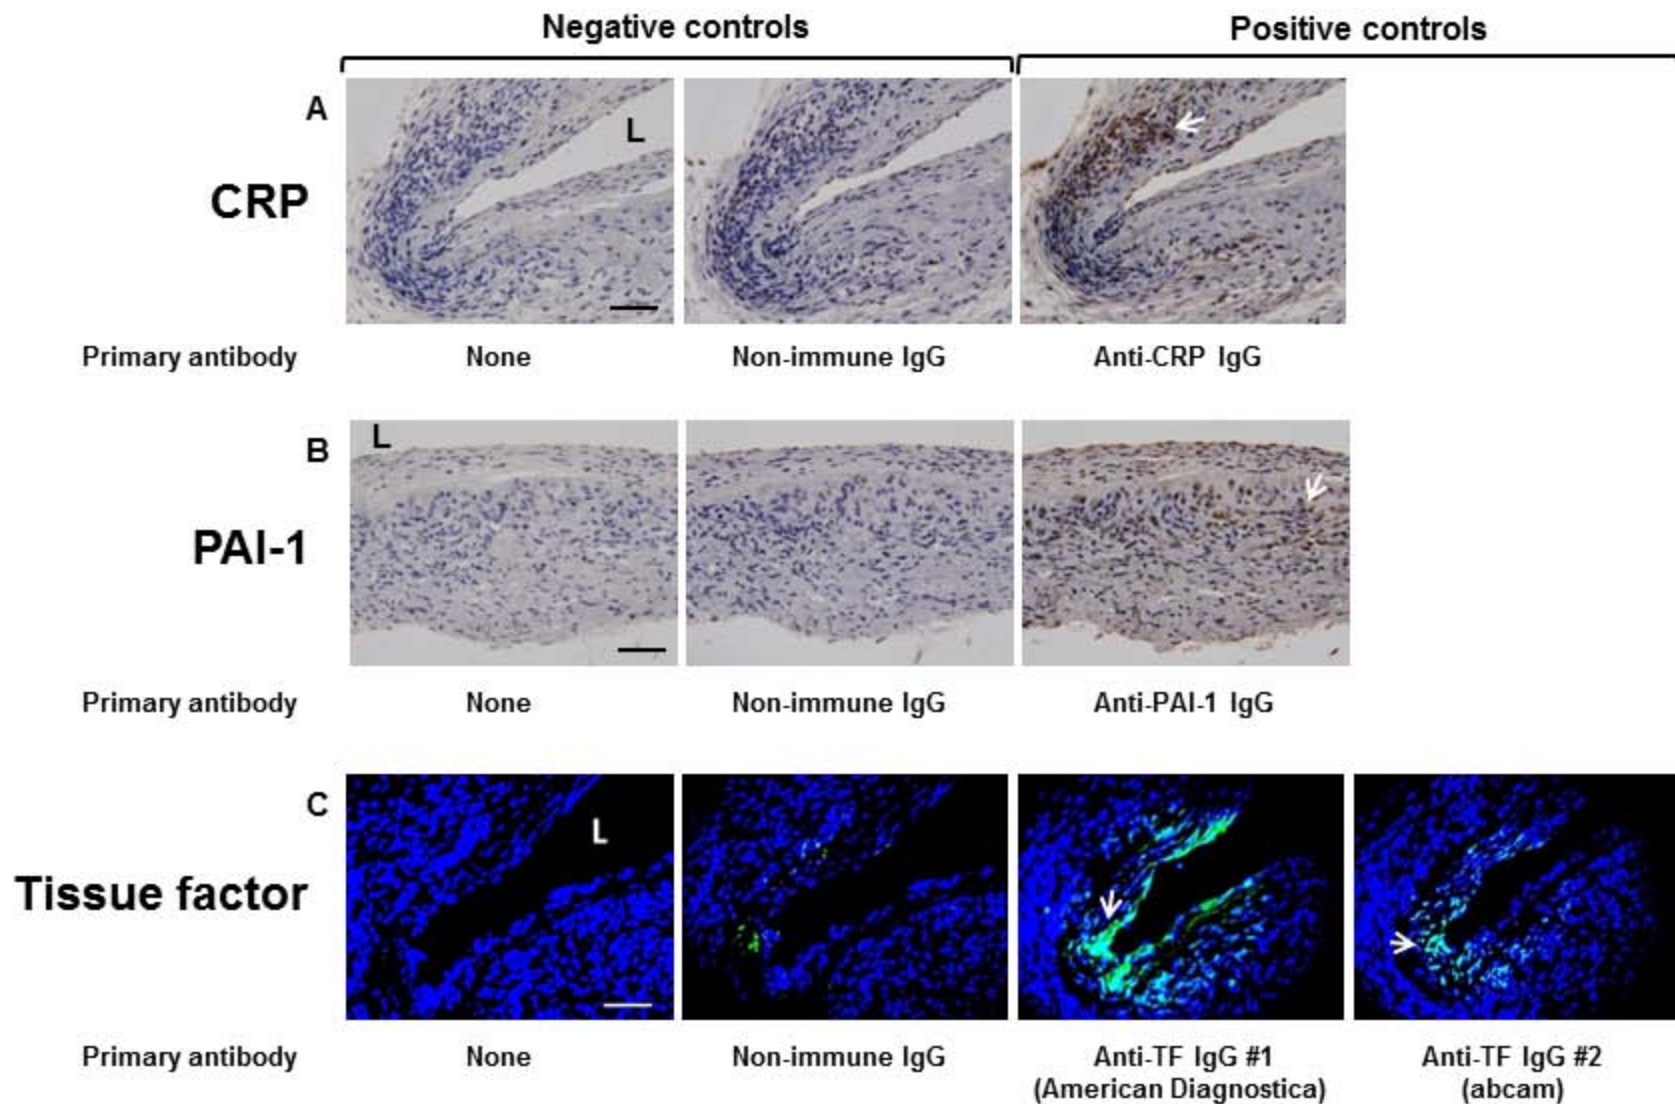

**Supplemental Figure 1.** Control immunostaining reactions. Consecutive, 5  $\mu\text{m}$ -thickness cross-sections of vein grafts (VGs) harvested 28 days after surgery from CRP-Tg<sup>donor</sup>/CRP-Tg<sup>recipient</sup> mice were subjected to immunostaining for (A) CRP, (B) plasminogen activator inhibitor-1 (PAI-1), and (C) tissue factor (TF). For each primary antibody (Ab), negative control reactions, consisting of buffer alone (i.e. no primary Ab = "none") or non-immune rabbit IgG (Thermo Fisher Scientific) were performed, as shown. In (A) and (B) secondary Ab for all samples was peroxidase-conjugated anti-rabbit-IgG. In (C) secondary Ab for all samples was DyLight488 goat anti-rabbit IgG (Vector Laboratories). For TF immunostaining two different anti-TF primary Abs were used, as shown. "L" denotes lumen of VG; scale bars = 50  $\mu\text{m}$ . Arrows denote areas of positive immunostaining.

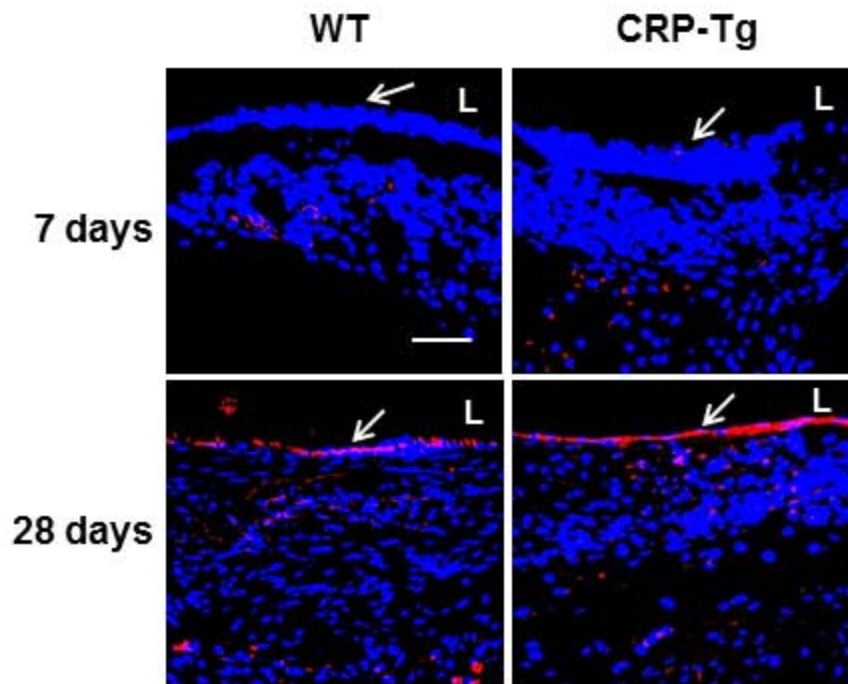

**Supplemental Figure 2.** Immuno-detection of vascular endothelial cells in vein grafts (VGs) of WT<sup>donor</sup>/WT<sup>recipient</sup> mice ("WT") and CRP-Tg<sup>donor</sup>/CRP-Tg<sup>recipient</sup> mice ("CRP-Tg"). VGs were harvested 7 days or 28 days after surgery, as indicated. "L" denotes lumen; scale bar = 50  $\mu$ m. Arrows denote vascular endothelial cell layer (anti-CD31 immunostaining, red immunofluorescence), which is predominantly absent at 7 days and present at 28 days. Nuclei within vascular wall are stained blue with DAPI.
